# Supplementary material for: Ultra-processed food exposure and adverse health outcomes: umbrella review of epidemiological meta-analyses
Source: PubMed Central journal article supplement — BMJ. 2024 Feb 28;384:e077310. doi: 10.1136/bmj-2023-077310 (PMC10899807; doi:10.1136/bmj-2023-077310), 2024-02-28
Supplement: lanm077310.ww1.pdf [file lanm077310.ww1.pdf]

### Supplementary table A. Search Strategy

| Database                                | Full search string                                                                                                                                                                                                                                                                                                                                                                                                                                                                                                                       |
|-----------------------------------------|------------------------------------------------------------------------------------------------------------------------------------------------------------------------------------------------------------------------------------------------------------------------------------------------------------------------------------------------------------------------------------------------------------------------------------------------------------------------------------------------------------------------------------------|
| MEDLINE                                 | <p>((("ultra-processed food"[All Fields] OR "ultraprocessed food"[All Fields] OR "ultra-processed foods"[All Fields] OR "ultraprocessed foods"[All Fields] OR "UPF"[All Fields] OR "nova food classification system"[All Fields] OR "nova food classification system"[All Fields])</p> <p>AND</p> <p>("meta-analysis"[All Fields] OR "metaanaly*" [All Fields] OR "meta regression"[All Fields] OR "metareg*" [All Fields] OR "systematic-review"[All Fields] OR "systematic-review"[All Fields]))</p> <p>AND</p> <p>2009:2023[pdat]</p> |
| PsycINFO                                | <p><b>(Any Field: "ultra-processed food" OR Any Field: "ultraprocessed food" OR Any Field: "ultra-processed foods" OR Any Field: "ultraprocessed foods" OR Any Field: UPF OR Any Field: "NOVA food classification system" OR Any Field: "Nova food classification system")</b></p> <p>AND</p> <p><b>(Any Field: "meta-analysis" OR Any Field: metaanaly* OR Any Field: "meta regression" OR Any Field: metareg* OR Any Field: "systematic review" OR Any Field: "systematic-review")</b></p> <p>AND</p> <p><b>Year: 2009 To 2023</b></p> |
| Embase                                  | <p>("ultra-processed food" OR "ultraprocessed food" OR "ultra-processed foods" OR "ultraprocessed foods" OR UPF OR "NOVA food classification system" OR "Nova food classification system")</p> <p>AND</p> <p>("meta-analysis" OR metaanaly* OR "meta regression" OR metareg* OR "systematic review" OR "systematic-review")</p> <p>AND</p> <p>(2009:py OR 2010:py OR 2011:py OR 2012:py OR 2013:py OR 2014:py OR 2015:py OR 2016:py OR 2017:py OR 2018:py OR 2019:py OR 2020:py OR 2021:py OR 2022:py OR 2023:py)</p>                    |
| Cochrane Database of Systematic Reviews | <p>((("ultra-processed food" OR "ultraprocessed food" OR "ultra-processed foods" OR "ultraprocessed foods" OR UPF OR "NOVA food classification system" OR "Nova food classification system")</p>                                                                                                                                                                                                                                                                                                                                         |

---

AND

("meta-analysis" OR metaanaly\* OR "meta regression" OR metareg\* OR "systematic review" OR "systematic-review"))

**Supplementary table B.** Step-by-step coding guide for recreating analysis for publication entitled ‘**Ultra-processed food exposure and adverse health outcomes: an umbrella review of epidemiological meta-analyses**’ by Lane et al. 2024

1. Download the dataset used for this analysis from the Open Science Framework (OSF): OSF link: <<https://osf.io/8j2gt/>>
2. Go to the online/web browser version of the R statistical package called *metaumbrella*: *metaumbrella* link: <<https://www.metaumbrella.org/app>>

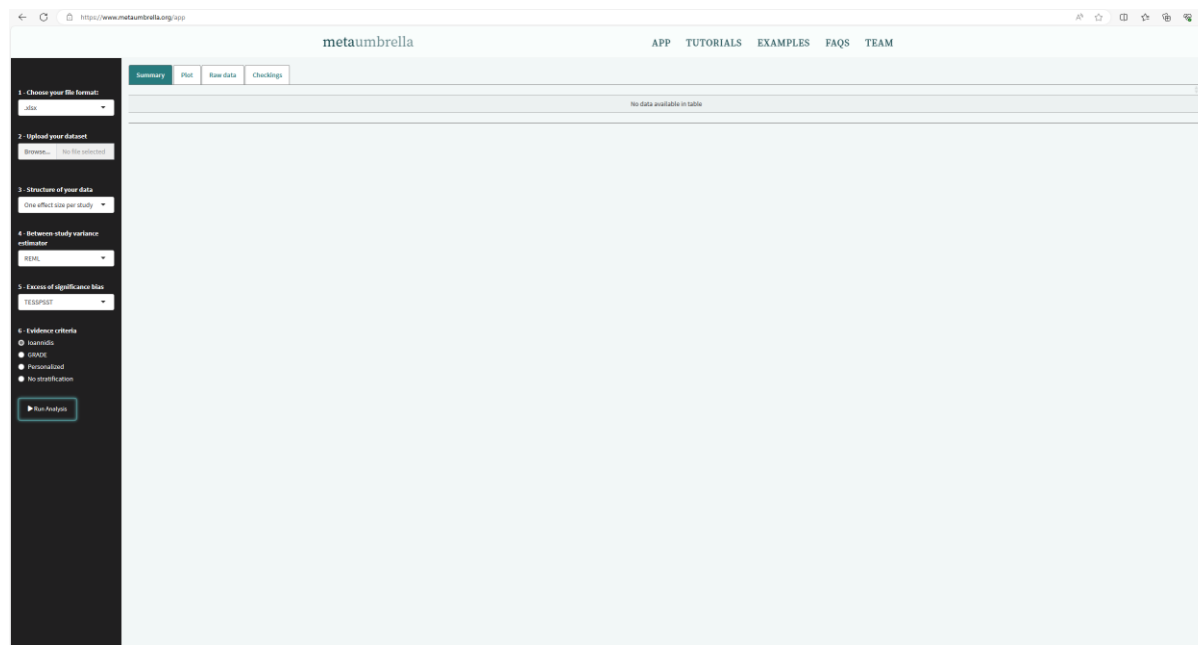

3. Click the Browse button under “2. Upload your dataset” on the left menu bar

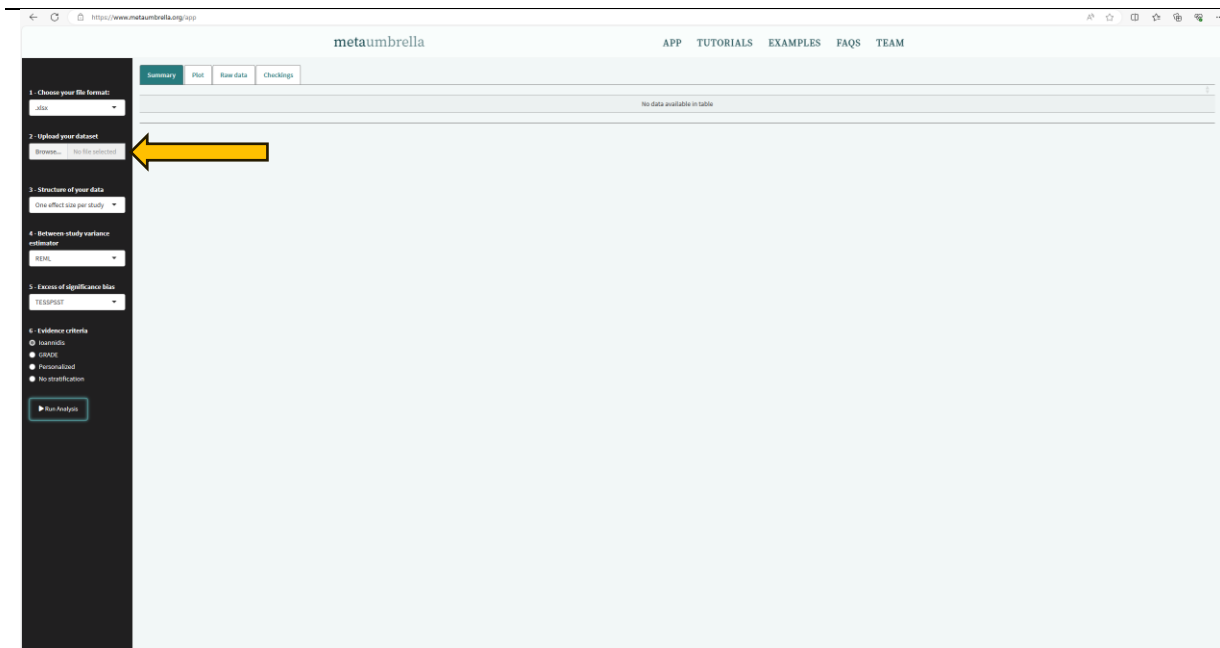

---

4. Navigate to where you downloaded the OSF dataset (see step 1) and upload this file

---

5. Navigate to the “Checkings” tab at the top of the screen to confirm dataset is coded correctly and to ensure that no warning messages have been produced while checking the formatting of your dataset

---

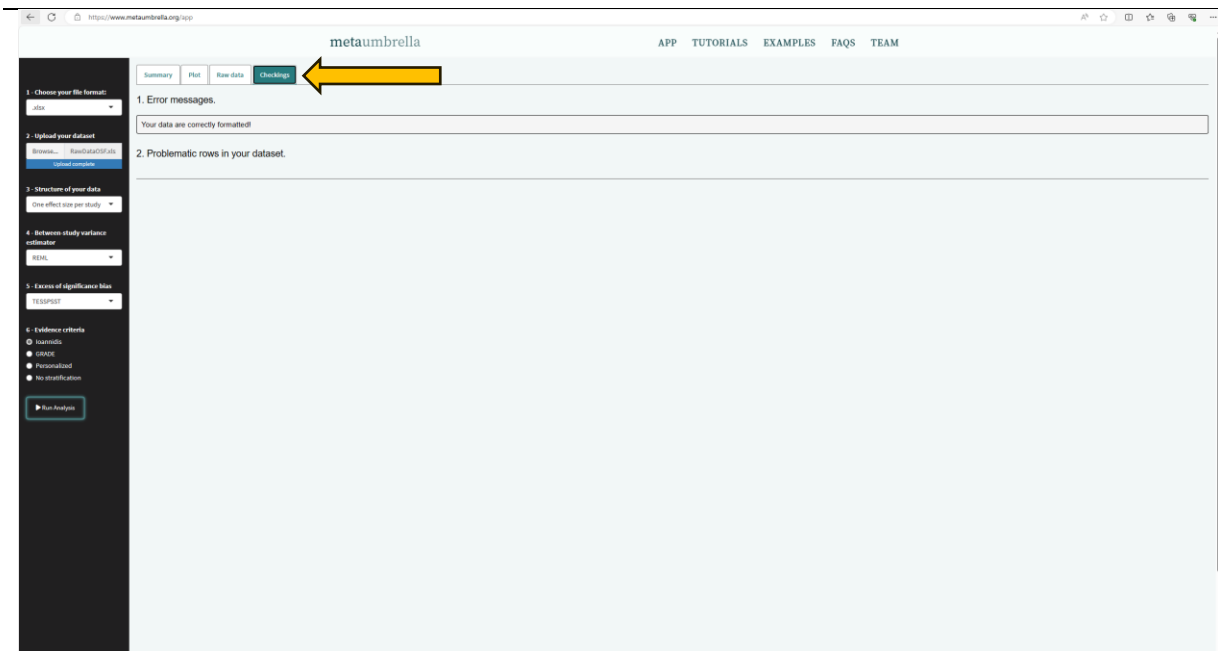

- 
6. Select “DL” (DerSimonian-Laird method) from the pulldown menu under “4. Between-study variance estimator” on the left menu bar
-

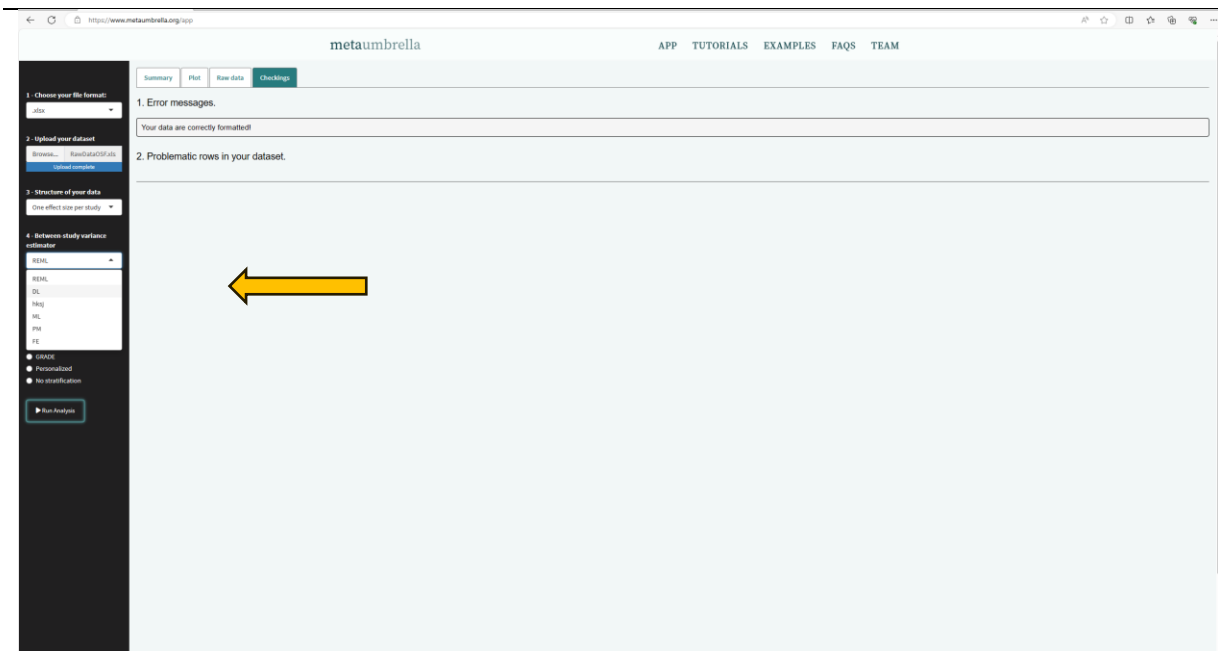

- 
7. Navigate to the “Summary” tab at the top of the screen and then click “Run Analysis” on the left menu bar
-

| 1. Choose your file format:         |  | Summary                                                        | Plot    | Raw data | Checkings | Search   |                |       |                |        |                |           |         |            |        |                 |                |         |  |  |
|-------------------------------------|--|----------------------------------------------------------------|---------|----------|-----------|----------|----------------|-------|----------------|--------|----------------|-----------|---------|------------|--------|-----------------|----------------|---------|--|--|
| 2. Upload your dataset              |  | Criteria                                                       | Class   | measure  | value     | value_CI | es             | es_CI | eOR            | eOR_CI | p_value        | n_studies | n_cases | n_controls | PL_eG  | PL_eOR          | PL_sign        |         |  |  |
| 3. Structure of your data           |  | Heart failure (border zones)                                   | tsamids | I        | OR        | 1.529    | [1.432, 1.632] | 0.234 | [0.196, 0.27]  | 1.529  | [1.432, 1.632] | 4.91e-37  | 6       | 41948      | 143825 | [0.189, 0.289]  | [1.38, 1.718]  | notnull |  |  |
| 4. Between study variance estimator |  | Arterial hypertension (Non-dose-response)                      | tsamids | I        | RR        | 1.497    | [1.374, 1.63]  | 0.222 | [0.175, 0.269] | 1.497  | [1.374, 1.63]  | 2.07e-20  | 4       | 4927       | 147852 | [0.119, 0.326]  | [1.241, 1.806] | notnull |  |  |
| 5. Excess of significance bias      |  | Type 2 diabetes (Non-dose-response)                            | tsamids | I        | OR        | 1.475    | [1.371, 1.586] | 0.214 | [0.174, 0.254] | 1.475  | [1.371, 1.586] | 1.35e-25  | 4       | 11711      | 89988  | [0.126, 0.382]  | [1.257, 1.731] | notnull |  |  |
| 6. Evidence criteria                |  | Type 2 diabetes (Non-dose-response)                            | tsamids | I        | RR        | 1.118    | [1.105, 1.131] | 0.061 | [0.055, 0.068] | 1.118  | [1.105, 1.131] | 2.29e-77  | 7       | 21932      | 393622 | [0.051, 0.071]  | [1.096, 1.137] | notnull |  |  |
| Run Analysis                        |  | Heart disease-related mortality (Non-dose-response)            | tsamids | II       | HR        | 1.064    | [1.006, 1.038] | 0.281 | [0.226, 0.336] | 1.064  | [1.006, 1.038] | 1.39e-23  | 2       | 4240       | 110126 | <3 studies      | <3 studies     | notnull |  |  |
|                                     |  | Obesity (Non-dose-response)                                    | tsamids | II       | OR        | 1.55     | [1.357, 1.771] | 0.242 | [0.166, 0.315] | 1.55   | [1.357, 1.771] | 1.18e-10  | 7       | 21241      | 75244  | [0.024, 0.45]   | [1.063, 2.24]  | notnull |  |  |
|                                     |  | Adverse sleep-related outcomes                                 | tsamids | II       | OR        | 1.412    | [1.241, 1.606] | 0.19  | [0.119, 0.261] | 1.412  | [1.241, 1.606] | 1.60e-07  | 2       | 4804       | 97387  | <3 studies      | <3 studies     | notnull |  |  |
|                                     |  | Whetting                                                       | tsamids | II       | RR        | 1.403    | [1.296, 1.524] | 0.187 | [0.13, 0.243]  | 1.403  | [1.296, 1.524] | 9.06e-11  | 2       | 25590      | 85704  | <3 studies      | <3 studies     | notnull |  |  |
|                                     |  | Type two diabetes (Non-dose-response)                          | tsamids | II       | OR        | 1.397    | [1.229, 1.586] | 0.184 | [0.114, 0.255] | 1.397  | [1.229, 1.586] | 0.13e-07  | 7       | 21932      | 393622 | [-0.049, 0.418] | [0.814, 1.131] | null    |  |  |
|                                     |  | Abdominal obesity (Non-dose-response)                          | tsamids | II       | HR        | 1.216    | [1.158, 1.277] | 0.108 | [0.081, 0.133] | 1.216  | [1.158, 1.277] | 1.42e-15  | 2       | 2665       | 38842  | <3 studies      | <3 studies     | notnull |  |  |
|                                     |  | All-cause mortality (Non-dose-response)                        | tsamids | II       | RR        | 1.207    | [1.151, 1.266] | 0.104 | [0.076, 0.13]  | 1.207  | [1.151, 1.266] | 8.80e-15  | 7       | 19827      | 268142 | [0.056, 0.151]  | [1.107, 1.316] | notnull |  |  |
|                                     |  | Abdominal obesity (Non-dose-response)                          | tsamids | III      | OR        | 1.497    | [1.175, 1.884] | 0.188 | [0.088, 0.287] | 1.497  | [1.175, 1.884] | 1.02e-04  | 4       | 13028      | 17821  | [-0.265, 0.581] | [0.68, 3.889]  | null    |  |  |
|                                     |  | Overweight (Non-dose-response)                                 | tsamids | III      | OR        | 1.362    | [1.139, 1.61]  | 0.17  | [0.072, 0.269] | 1.362  | [1.139, 1.61]  | 7.25e-04  | 4       | 19927      | 22893  | [-0.24, 0.581]  | [0.647, 2.87]  | null    |  |  |
|                                     |  | Cardiovascular disease events combined (morbidity + mortality) | tsamids | III      | RR        | 1.347    | [1.182, 1.536] | 0.164 | [0.092, 0.237] | 1.347  | [1.182, 1.536] | 8.16e-06  | 6       | 8235       | 280601 | [-0.041, 0.37]  | [0.929, 1.955] | null    |  |  |
|                                     |  | Colorectal cancer (Non-dose-response)                          | tsamids | III      | OR        | 1.233    | [1.101, 1.379] | 0.115 | [0.053, 0.177] | 1.233  | [1.101, 1.379] | 1.63e-04  | 7       | 8405       | 714857 | [-0.072, 0.382] | [0.878, 1.71]  | null    |  |  |
|                                     |  | Hypertension                                                   | tsamids | III      | OR        | 1.232    | [1.107, 1.371] | 0.115 | [0.056, 0.174] | 1.232  | [1.107, 1.371] | 1.39e-04  | 9       | 13386      | 98208  | [-0.044, 0.274] | [0.924, 1.642] | null    |  |  |
|                                     |  | Cardiovascular disease morbidity (Non-dose-response)           | tsamids | III      | RR        | 1.204    | [1.086, 1.331] | 0.102 | [0.047, 0.158] | 1.204  | [1.086, 1.331] | 2.77e-04  | 2       | 3308       | 113049 | <3 studies      | <3 studies     | notnull |  |  |
|                                     |  | Cancer overall (Non-dose-response)                             | tsamids | III      | HR        | 1.123    | [1.057, 1.191] | 0.064 | [0.031, 0.097] | 1.123  | [1.057, 1.191] | 1.77e-04  | 7       | 7004       | 818897 | [-0.054, 0.142] | [0.878, 1.291] | null    |  |  |
|                                     |  | Obesity (Dose-response)                                        | tsamids | III      | OR        | 1.071    | [1.01, 1.134]  | 0.038 | [0.016, 0.06]  | 1.071  | [1.01, 1.134]  | 5.47e-04  | 7       | 15769      | 64295  | [-0.01, 0.106]  | [0.947, 1.212] | null    |  |  |

8. To export data, scroll to the bottom of the dataset and export as either a CSV, Excel, or PDF file

|                                                          |          |    |    |       |                |        |                 |       |                |          |   |       |        |                |                |      |
|----------------------------------------------------------|----------|----|----|-------|----------------|--------|-----------------|-------|----------------|----------|---|-------|--------|----------------|----------------|------|
| Non-dose-response                                        | Isaenids | IV | OR | 1.287 | [1.05, 1.578]  | 0.139  | [0.071, 0.251]  | 1.287 | [1.05, 1.578]  | 1.53e-02 | 2 | 13791 | 18520  | * 3 studies    | * 3 studies    |      |
| Metabolic syndrome                                       | Isaenids | IV | RR | 1.247 | [1.091, 1.422] | 0.121  | [0.045, 0.194]  | 1.247 | [1.091, 1.422] | 1.05e-03 | 9 | 8998  | 14502  | [0.097, 0.34]  | [0.836, 1.454] | null |
| Non-alcoholic fatty liver disease Non-dose response      | Isaenids | IV | RR | 1.229 | [1.034, 1.46]  | 0.114  | [0.019, 0.206]  | 1.229 | [1.034, 1.46]  | 1.80e-02 | 4 | 9057  | 18093  | [0.293, 0.52]  | [0.586, 2.957] | null |
| Cardiovascular disease-related mortality - Dose response | Isaenids | IV | RR | 1.047 | [1.015, 1.08]  | 0.025  | [0.008, 0.04]   | 1.047 | [1.015, 1.08]  | 4.12e-03 | 5 | 7125  | 14028  | [0.036, 0.066] | [0.897, 1.188] | null |
| Colorectal cancer - dose response                        | Isaenids | IV | OR | 1.039 | [1.008, 1.07]  | 0.021  | [0.005, 0.037]  | 1.039 | [1.008, 1.07]  | 1.20e-02 | 5 | 6881  | 71262  | [0.028, 0.07]  | [0.95, 1.136]  | null |
| Overweight/obesity Dose response                         | Isaenids | IV | OR | 1.032 | [1.01, 1.055]  | 0.018  | [0.005, 0.03]   | 1.032 | [1.01, 1.055]  | 5.15e-03 | 3 | 4302  | 10850  | [0.099, 0.134] | [0.836, 1.376] | null |
| Pancreatic cancer Non-dose-response                      | Isaenids | ns | OR | 1.235 | [0.853, 1.788] | 0.116  | [-0.068, 0.32]  | 1.235 | [0.853, 1.788] | 2.64e-01 | 2 | 773   | 29418  | * 3 studies    | * 3 studies    |      |
| Asthma                                                   | Isaenids | ns | RR | 1.203 | [0.984, 1.484] | 0.102  | [-0.007, 0.21]  | 1.203 | [0.984, 1.484] | 6.55e-02 | 2 | 14017 | 97257  | * 3 studies    | * 3 studies    |      |
| Central nervous system tumors                            | Isaenids | ns | OR | 1.197 | [0.866, 1.656] | 0.099  | [-0.068, 0.278] | 1.197 | [0.866, 1.656] | 2.79e-01 | 2 | 328   | 197230 | * 3 studies    | * 3 studies    |      |
| Heart disease-related mortality - dose response          | Isaenids | ns | HR | 1.179 | [0.946, 1.47]  | 0.091  | [-0.03, 0.212]  | 1.179 | [0.946, 1.47]  | 1.42e-01 | 2 | 4240  | 133228 | * 3 studies    | * 3 studies    |      |
| Ulcerative colitis                                       | Isaenids | ns | HR | 1.172 | [0.856, 1.606] | 0.088  | [-0.086, 0.261] | 1.172 | [0.856, 1.606] | 3.22e-01 | 4 | 1886  | 968707 | [0.465, 0.84]  | [0.299, 4.591] | null |
| Breast cancer Non-dose response                          | Isaenids | ns | OR | 1.156 | [0.903, 1.335] | 0.078  | [-0.004, 0.159] | 1.151 | [0.903, 1.335] | 4.28e-02 | 6 | 8220  | 274024 | [0.135, 0.202] | [0.783, 1.692] | null |
| Hyperglycaemia                                           | Isaenids | ns | OR | 1.1   | [0.344, 3.513] | 0.053  | [-0.588, 0.493] | 1.1   | [0.344, 3.513] | 8.72e-01 | 2 | 511   | 602    | * 3 studies    | * 3 studies    |      |
| Chronic lymphocytic leukaemia                            | Isaenids | ns | OR | 1.078 | [0.804, 1.443] | 0.041  | [-0.12, 0.203]  | 1.078 | [0.804, 1.443] | 6.18e-01 | 2 | 448   | 198768 | * 3 studies    | * 3 studies    |      |
| Prostate cancer Non-dose response                        | Isaenids | ns | OR | 1.06  | [0.839, 1.34]  | 0.032  | [-0.090, 0.161] | 1.06  | [0.839, 1.34]  | 6.23e-01 | 1 | 951   | 1282   | * 3 studies    | * 3 studies    |      |
| Breast cancer - dose response                            | Isaenids | ns | OR | 1.033 | [0.976, 1.092] | 0.018  | [-0.013, 0.049] | 1.033 | [0.976, 1.092] | 2.66e-01 | 3 | 5240  | 277444 | [0.319, 0.354] | [0.561, 1.002] | null |
| Prostate cancer Non-dose response                        | Isaenids | ns | OR | 1.019 | [0.921, 1.126] | 0.01   | [-0.045, 0.096] | 1.019 | [0.921, 1.126] | 7.19e-01 | 3 | 5621  | 218338 | [0.249, 0.37]  | [0.521, 1.050] | null |
| Cancer-related mortality                                 | Isaenids | ns | HR | 1.003 | [0.811, 1.24]  | 0.002  | [-0.115, 0.119] | 1.003 | [0.811, 1.24]  | 9.79e-01 | 2 | 641   | 41592  | * 3 studies    | * 3 studies    |      |
| Prostate cancer - dose response                          | Isaenids | ns | OR | 0.992 | [0.965, 1.021] | -0.004 | [-0.02, 0.011]  | 0.992 | [0.965, 1.021] | 6.02e-01 | 3 | 4853  | 217807 | [0.196, 0.497] | [0.826, 1.193] | null |
| Hypertriglyceridaemia                                    | Isaenids | ns | OR | 0.947 | [0.597, 1.501] | -0.03  | [-0.266, 0.224] | 0.947 | [0.597, 1.501] | 8.17e-01 | 2 | 382   | 721    | * 3 studies    | * 3 studies    |      |

Copy

CSV

Excel

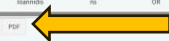



**Supplementary table C. The evidence classification criteria**

---

- Convincing (Class I)**
- The number of cases is >1000 (or >20,000 for continuous outcomes)
  - $P$  of  $<1 \times 10^{-6}$
  - $I^2 < 50\%$
  - 95% prediction interval excludes the null hypothesis
  - ~~The largest included individual study exhibits  $P \leq 0.05$~~
  - No small-study effects
  - No excess significance bias
- 

- Highly suggestive (Class II)**
- Class I criteria not all met
  - The number of cases is >1000
  - $P$  of  $<1 \times 10^{-6}$
  - The largest included individual study exhibits  $P \leq 0.05$
- 

- Suggestive (Class III)**
- Class I—II criteria not all met
  - The number of cases is >1000
  - $P$  of  $<1 \times 10^{-3}$
- 

- Weak (Class IV)**
- Class I—III criteria not all met
  - $P \leq 0.05$
  -
-

---

**No evidence (Class V)**

- $P > 0.05$
-

**Table D.** Quality Assessment Using the GRADE Framework of Each Pooled Analysis Assessing Associations Between Ultra-Processed Food Exposure and Adverse Health Outcomes

| <b>Outcome: Level of exposure comparison</b>                              | <b>Studies, <i>n</i></b> | <b>Study design</b> | <b>Risk of bias</b> | <b>Inconsistency</b> | <b>Indirectness</b> | <b>Imprecision</b> | <b>Other considerations</b> | <b>Certainty</b> |
|---------------------------------------------------------------------------|--------------------------|---------------------|---------------------|----------------------|---------------------|--------------------|-----------------------------|------------------|
| <b>Mortality</b>                                                          |                          |                     |                     |                      |                     |                    |                             |                  |
| All-cause mortality <sup>1</sup> : Non-dose-response                      | 7                        | Observational       | Not Serious         | Not Serious          | Not Serious         | Not Serious        | None                        | Low              |
| All-cause mortality <sup>1</sup> : Dose-response                          | 9                        | Observational       | Not Serious         | Not Serious          | Not Serious         | Not Serious        | Dose-Response Gradient      | Moderate         |
| Cancer-related mortality <sup>2</sup> : Non-dose-response                 | 2                        | Observational       | Not Serious         | Not Serious          | Not Serious         | Not Serious        | None                        | Low              |
| Cardiovascular disease-related mortality <sup>1</sup> : Non-dose-response | 4                        | Observational       | Not Serious         | Serious <sup>a</sup> | Not Serious         | Not Serious        | None                        | Very Low         |
| Cardiovascular disease-related mortality <sup>1</sup> : Dose-response     | 5                        | Observational       | Not Serious         | Serious <sup>a</sup> | Not Serious         | Not Serious        | Dose-Response Gradient      | Low              |

| <b>Outcome: Level of exposure comparison</b>                     | <b>Studies, <i>n</i></b> | <b>Study design</b> | <b>Risk of bias</b>  | <b>Inconsistency</b> | <b>Indirectness</b> | <b>Imprecision</b>   | <b>Other considerations</b> | <b>Certainty</b> |
|------------------------------------------------------------------|--------------------------|---------------------|----------------------|----------------------|---------------------|----------------------|-----------------------------|------------------|
| Heart disease-related mortality <sup>2</sup> : Non-dose-response | 2                        | Observational       | Not Serious          | Not Serious          | Not Serious         | Not Serious          | None                        | Low              |
| Heart disease-related mortality <sup>2</sup> : Dose-response     | 2                        | Observational       | Not Serious          | Serious <sup>a</sup> | Not Serious         | Not Serious          | Dose-Response Gradient      | Low              |
| <b>Cancer</b>                                                    |                          |                     |                      |                      |                     |                      |                             |                  |
| Breast cancer <sup>3</sup> : Non-dose-response                   | 6                        | Observational       | Not Serious          | Not Serious          | Not Serious         | Serious <sup>b</sup> | None                        | Very Low         |
| Breast cancer <sup>3</sup> : Dose-response                       | 3                        | Observational       | Not Serious          | Serious <sup>a</sup> | Not Serious         | Not Serious          | Dose-Response Gradient      | Low              |
| Cancer overall <sup>4</sup> : Non-dose-response                  | 7                        | Observational       | Serious <sup>c</sup> | Not Serious          | Not Serious         | Not Serious          | None                        | Very Low         |
| Central nervous system tumours <sup>3</sup> : Non-dose-response  | 2                        | Observational       | Not Serious          | Serious <sup>a</sup> | Not Serious         | Serious <sup>d</sup> | None                        | Very Low         |
| Chronic lymphocytic leukemia <sup>3</sup> :                      | 2                        | Observational       | Not Serious          | Not Serious          | Not Serious         | Serious <sup>d</sup> | None                        | Very Low         |

| <b>Outcome: Level of exposure comparison</b>                    | <b>Studies, <i>n</i></b> | <b>Study design</b> | <b>Risk of bias</b> | <b>Inconsistency</b> | <b>Indirectness</b> | <b>Imprecision</b>   | <b>Other considerations</b> | <b>Certainty</b> |
|-----------------------------------------------------------------|--------------------------|---------------------|---------------------|----------------------|---------------------|----------------------|-----------------------------|------------------|
| Non-dose-response                                               |                          |                     |                     |                      |                     |                      |                             |                  |
| Colorectal cancer <sup>3</sup> : Non-dose-response              | 7                        | Observational       | Not Serious         | Serious <sup>a</sup> | Not Serious         | Not Serious          | None                        | Very Low         |
| Colorectal cancer <sup>3</sup> : Dose-response                  | 5                        | Observational       | Not Serious         | Serious <sup>a</sup> | Not Serious         | Not Serious          | Dose-Response Gradient      | Low              |
| Pancreatic cancer <sup>3</sup> : Non-dose-response              | 2                        | Observational       | Not Serious         | Serious <sup>a</sup> | Not Serious         | Serious <sup>d</sup> | None                        | Very Low         |
| Prostate cancer <sup>3</sup> : Non-dose-response                | 4                        | Observational       | Not Serious         | Not Serious          | Not Serious         | Not Serious          | None                        | Low              |
| Prostate cancer <sup>3</sup> : Dose-response                    | 3                        | Observational       | Not Serious         | Not Serious          | Not Serious         | Not Serious          | Dose-Response Gradient      | Moderate         |
| <b>Mental Health</b>                                            |                          |                     |                     |                      |                     |                      |                             |                  |
| Adverse sleep-related outcomes <sup>5</sup> : Non-dose-response | 2                        | Observational       | Not Serious         | Not Serious          | Not Serious         | Not Serious          | None                        | Low              |

| <b>Outcome: Level of exposure comparison</b>                                 | <b>Studies, <i>n</i></b> | <b>Study design</b> | <b>Risk of bias</b> | <b>Inconsistency</b> | <b>Indirectness</b> | <b>Imprecision</b>   | <b>Other considerations</b> | <b>Certainty</b> |
|------------------------------------------------------------------------------|--------------------------|---------------------|---------------------|----------------------|---------------------|----------------------|-----------------------------|------------------|
| Anxiety outcomes <sup>6</sup> :<br>Non-dose-response                         | 4                        | Observational       | Not Serious         | Not Serious          | Not Serious         | Not Serious          | None                        | Low              |
| Combined common mental disorder outcomes <sup>6</sup> :<br>Non-dose-response | 6                        | Observational       | Not Serious         | Not Serious          | Not Serious         | Not Serious          | None                        | Low              |
| Depressive outcomes <sup>6</sup> :<br>Non-dose-response                      | 2                        | Observational       | Not Serious         | Not Serious          | Not Serious         | Not Serious          | None                        | Low              |
| <b>Respiratory Health</b>                                                    |                          |                     |                     |                      |                     |                      |                             |                  |
| Asthma <sup>7</sup> : Non-dose-response                                      | 2                        | Observational       | Not Serious         | Not Serious          | Not Serious         | Serious <sup>b</sup> | None                        | Very Low         |
| Wheezing <sup>7</sup> : Non-dose-response                                    | 2                        | Observational       | Not Serious         | Not Serious          | Not Serious         | Not Serious          | None                        | Low              |
| <b>Cardiovascular Health</b>                                                 |                          |                     |                     |                      |                     |                      |                             |                  |

| <b>Outcome: Level of exposure comparison</b>                                                    | <b>Studies, <i>n</i></b> | <b>Study design</b> | <b>Risk of bias</b> | <b>Inconsistency</b> | <b>Indirectness</b> | <b>Imprecision</b> | <b>Other considerations</b> | <b>Certainty</b> |
|-------------------------------------------------------------------------------------------------|--------------------------|---------------------|---------------------|----------------------|---------------------|--------------------|-----------------------------|------------------|
| Cardiovascular disease events combined (morbidity + mortality) <sup>1</sup> : Non-dose-response | 6                        | Observational       | Not Serious         | Serious <sup>a</sup> | Not Serious         | Not Serious        | None                        | Very Low         |
| Cardiovascular disease events combined (morbidity + mortality) <sup>1</sup> : Dose-response     | 8                        | Observational       | Not Serious         | Serious <sup>a</sup> | Not Serious         | Not Serious        | Dose-Response Gradient      | Low              |
| Cardiovascular disease morbidity <sup>1</sup> : Non-dose-response                               | 2                        | Observational       | Not Serious         | Not Serious          | Not Serious         | Not Serious        | None                        | Low              |
| Cardiovascular disease morbidity <sup>1</sup> : Dose-response                                   | 2                        | Observational       | Not Serious         | Serious <sup>a</sup> | Not Serious         | Not Serious        | Dose-Response Gradient      | Low              |
| Hypertension <sup>8</sup> : Non-dose-response                                                   | 9                        | Observational       | Serious             | Serious <sup>a</sup> | Not Serious         | Not Serious        | None                        | Very Low         |

| <b>Outcome: Level of exposure comparison</b>                                | <b>Studies, <i>n</i></b> | <b>Study design</b> | <b>Risk of bias</b> | <b>Inconsistency</b> | <b>Indirectness</b> | <b>Imprecision</b>   | <b>Other considerations</b> | <b>Certainty</b> |
|-----------------------------------------------------------------------------|--------------------------|---------------------|---------------------|----------------------|---------------------|----------------------|-----------------------------|------------------|
| Hypertriglyceridemia <sup>9</sup> : Non-dose-response                       | 2                        | Observational       | Serious             | Not Serious          | Not Serious         | Serious <sup>d</sup> | None                        | Very Low         |
| Low high-density lipoprotein concentration <sup>9</sup> : Non-dose-response | 2                        | Observational       | Serious             | Not Serious          | Not Serious         | Serious <sup>d</sup> | None                        | Very Low         |
| <b>Gastrointestinal Health</b>                                              |                          |                     |                     |                      |                     |                      |                             |                  |
| Crohn's disease <sup>10</sup> : Non-dose-response                           | 4                        | Observational       | Not Serious         | Not Serious          | Not Serious         | Not Serious          | None                        | Low              |
| Ulcerative colitis <sup>10</sup> : Non-dose-response                        | 4                        | Observational       | Not Serious         | Serious <sup>a</sup> | Not Serious         | Serious <sup>d</sup> | None                        | Very Low         |
| <b>Metabolic Health</b>                                                     |                          |                     |                     |                      |                     |                      |                             |                  |
| Abdominal obesity <sup>11</sup> : Non-dose-response                         | 4                        | Observational       | Not Serious         | Serious <sup>a</sup> | Not Serious         | Not Serious          | None                        | Very Low         |



| <b>Outcome: Level of exposure comparison</b>                        | <b>Studies, <i>n</i></b> | <b>Study design</b> | <b>Risk of bias</b> | <b>Inconsistency</b> | <b>Indirectness</b> | <b>Imprecision</b>        | <b>Other considerations</b> | <b>Certainty</b> |
|---------------------------------------------------------------------|--------------------------|---------------------|---------------------|----------------------|---------------------|---------------------------|-----------------------------|------------------|
| Abdominal obesity <sup>11</sup> : Dose-response                     | 6                        | Observational       | Not Serious         | Serious <sup>a</sup> | Not Serious         | Not Serious               | Dose-Response Gradient      | Low              |
| Hyperglycaemia <sup>9</sup> : Non-dose-response                     | 2                        | Observational       | Serious             | Serious <sup>a</sup> | Not Serious         | Very Serious <sup>e</sup> | None                        | Very Low         |
| Metabolic syndrome <sup>12</sup> : Non-dose-response                | 9                        | Observational       | Not Serious         | Serious <sup>a</sup> | Not Serious         | Not Serious               | None                        | Very Low         |
| Non-alcoholic fatty liver disease <sup>13</sup> : Non-dose-response | 4                        | Observational       | Serious             | Not Serious          | Not Serious         | Not Serious               | None                        | Very Low         |
| Obesity <sup>11</sup> : Non-dose-response                           | 7                        | Observational       | Not Serious         | Not Serious          | Not Serious         | Not Serious               | None                        | Low              |
| Obesity <sup>11</sup> : Dose-response                               | 7                        | Observational       | Not Serious         | Serious <sup>a</sup> | Not Serious         | Not Serious               | Dose-Response Gradient      | Low              |
| Overweight <sup>11</sup> : Non-dose-response                        | 4                        | Observational       | Not Serious         | Serious <sup>a</sup> | Not Serious         | Not Serious               | None                        | Very Low         |

| <b>Outcome: Level of exposure comparison</b>           | <b>Studies, <i>n</i></b> | <b>Study design</b> | <b>Risk of bias</b> | <b>Inconsistency</b> | <b>Indirectness</b> | <b>Imprecision</b> | <b>Other considerations</b> | <b>Certainty</b> |
|--------------------------------------------------------|--------------------------|---------------------|---------------------|----------------------|---------------------|--------------------|-----------------------------|------------------|
| Overweight <sup>11</sup> : Dose-response               | 2                        | Observational       | Not Serious         | Serious <sup>a</sup> | Not Serious         | Not Serious        | Dose-Response Gradient      | Low              |
| Overweight + obesity <sup>11</sup> : Non-dose-response | 2                        | Observational       | Not Serious         | Not Serious          | Not Serious         | Not Serious        | None                        | Low              |
| Overweight + obesity <sup>11</sup> : Dose-response     | 3                        | Observational       | Not Serious         | Not Serious          | Not Serious         | Not Serious        | Dose-Response Gradient      | Moderate         |
| Type two diabetes <sup>14</sup> : Non-dose-response    | 7                        | Observational       | Not Serious         | Serious <sup>a</sup> | Not Serious         | Not Serious        | None                        | Very Low         |
| Type two diabetes <sup>14</sup> : Dose-response        | 7                        | Observational       | Not Serious         | Not Serious          | Not Serious         | Not Serious        | Dose-Response Gradient      | Moderate         |

*Note* GRADE=Grading of Recommendations, Assessment, Development, and Evaluation

a.  $I^2$  value >50

b. Wide confidence intervals that include null effect and increased risk

c. Majority of studies rated as poor/fair quality by study authors

d. Wide confidence intervals that cross decision threshold

e. Very wide confidence intervals that cross decision thresholds

**Supplementary table E.** The A Measurement Tool to Assess Systematic Reviews – Second Edition (AMSTAR 2) Quality Assessment Tool, by Health Outcome Domains

| Author / Year        | Outcomes investigated                                                                                                 | *1 | *2 | *3 | *4 | *5 | *6 | *7 | *8 | *9 | *10 | *11 | *12 | *13 | *14 | *15 | *16 |
|----------------------|-----------------------------------------------------------------------------------------------------------------------|----|----|----|----|----|----|----|----|----|-----|-----|-----|-----|-----|-----|-----|
| Yuan et al. 2023     | All-cause mortality, Cardiovascular disease events combined (morbidity + mortality), Cardiovascular disease morbidity | 2  | 2  | 0  | 1  | 2  | 2  | 2  | 2  | 2  | 0   | 2   | 2   | 2   | 2   | 2   | 2   |
| Suksatan et al. 2021 | Cancer-related mortality, Heart disease-related mortality                                                             | 2  | 0  | 0  | 1  | 2  | 2  | 2  | 2  | 2  | 0   | 2   | 2   | 2   | 2   | 2   | 2   |
| Lian et al. 2023     | Breast cancer, Central nervous system tumours, Colorectal cancer, Pancreatic cancer, Prostate cancer                  | 2  | 0  | 0  | 1  | 0  | 2  | 2  | 2  | 2  | 0   | 2   | 2   | 2   | 0   | 2   | 2   |
| Isaksen et al. 2023  | Cancer overall                                                                                                        | 2  | 0  | 0  | 1  | 0  | 0  | 2  | 2  | 2  | 0   | 2   | 0   | 2   | 0   | 0   | 2   |
| Delpino et al. 2023  | Adverse sleep-related outcomes                                                                                        | 2  | 2  | 0  | 1  | 2  | 2  | 2  | 2  | 2  | 0   | 2   | 0   | 2   | 0   | 0   | 0   |
| Lane et al. 2023     | Combined common mental disorder outcomes, Anxiety outcomes, Depressive outcomes                                       | 2  | 2  | 0  | 0  | 2  | 2  | 2  | 2  | 2  | 0   | 2   | 0   | 2   | 0   | 0   | 2   |
| Lane et al. 2021     | Asthma, Wheezing                                                                                                      | 2  | 2  | 0  | 0  | 2  | 2  | 2  | 2  | 2  | 0   | 2   | 2   | 2   | 2   | 0   | 2   |
| Wang et al. 2022     | Hypertension                                                                                                          | 2  | 0  | 0  | 1  | 2  | 0  | 2  | 2  | 2  | 0   | 2   | 2   | 2   | 0   | 2   | 2   |
| Pagliai et al. 2021  | Hypertriglyceridaemia, Low high-density lipoprotein                                                                   | 2  | 1  | 0  | 1  | 2  | 2  | 2  | 2  | 2  | 0   | 2   | 0   | 2   | 2   | 2   | 2   |

|                    |                                                                          |   |   |   |   |   |   |   |   |   |   |   |   |   |   |   |   |
|--------------------|--------------------------------------------------------------------------|---|---|---|---|---|---|---|---|---|---|---|---|---|---|---|---|
|                    | concentration,<br>Hyperglycaemia                                         |   |   |   |   |   |   |   |   |   |   |   |   |   |   |   |   |
| Narula et al. 2023 | Crohn's disease,<br>Ulcerative colitis                                   | 2 | 2 | 0 | 1 | 2 | 2 | 0 | 2 | 2 | 0 | 2 | 2 | 2 | 0 | 2 | 2 |
| Moradi et al. 2023 | Abdominal obesity,<br>Obesity,<br>Overweight,<br>Overweight +<br>obesity | 2 | 0 | 0 | 1 | 2 | 2 | 2 | 2 | 2 | 0 | 2 | 0 | 2 | 2 | 2 | 0 |
| Shu et al. 2023    | Metabolic<br>syndrome                                                    | 2 | 0 | 0 | 1 | 2 | 2 | 2 | 2 | 2 | 0 | 2 | 2 | 2 | 2 | 2 | 2 |
| Henney et al. 2023 | Non-alcoholic fatty<br>liver disease                                     | 2 | 2 | 0 | 1 | 2 | 2 | 2 | 2 | 2 | 0 | 2 | 2 | 2 | 0 | 2 | 2 |
| Chen et al. 2023   | Type two diabetes                                                        | 2 | 2 | 0 | 1 | 2 | 2 | 2 | 2 | 2 | 0 | 2 | 0 | 2 | 2 | 0 | 2 |

Note 0 = No; 1 = Partial Yes; 2 = Yes. Shaded columns = AMSTAR 2 critical domains

\*1. Did the research questions and inclusion criteria for the review include the components of PICO?

\*2. Did the report of the review contain an explicit statement that the review methods were established prior to the conduct of the review and did the report justify any significant deviations from the protocol?

\*3. Did the review authors explain their selection of the study designs for inclusion in the review?

\*4. Did the review authors use a comprehensive literature search strategy?

\*5. Did the review authors perform study selection in duplicate?

\*6. Did the review authors perform data extraction in duplicate?

\*7. Did the review authors provide a list of excluded studies and justify the exclusions?

\*8. Did the review authors describe the included studies in adequate detail?

\*9. Did the review authors use a satisfactory technique for assessing the risk of bias (RoB) in individual studies that were included in the review?

\*10. Did the review authors report on the sources of funding for the studies included in the review?

\*11. If meta-analysis was performed, did the review authors use appropriate methods for statistical combination of results?

\*12. If meta-analysis was performed, did the review authors assess the potential impact of RoB in individual studies on the results of the meta-analysis or other evidence synthesis?

\*13. Did the review authors account for RoB in primary studies when interpreting/discussing the results of the review?

\*14. Did the review authors provide a satisfactory explanation for, and discussion of, any heterogeneity observed in the results of the review?

\*15. If they performed quantitative synthesis did the review authors carry out an adequate investigation of publication bias (small study bias) and discuss its likely impact on the results of the review?

\*16. Did the review authors report any potential sources of conflict of interest, including any funding they received for conducting the review?

**Supplementary table F.** Summary Characteristics of Included Original Research Articles

| <b>Outcome</b>                           | <b>Author</b>      | <b>Year</b> | <b>Stud design</b> | <b>Population</b> | <b>Exposure measurements</b> |
|------------------------------------------|--------------------|-------------|--------------------|-------------------|------------------------------|
| <b>Mortality</b>                         |                    |             |                    |                   |                              |
| All-cause mortality                      |                    |             |                    |                   |                              |
|                                          | Schnabel et al.    | 2019        | Prospective cohort | Adults            | 24-hr recall                 |
|                                          | Rico-Campa et al.  | 2019        | Prospective cohort | Adults            | FFQ                          |
|                                          | Kim et al.         | 2019        | Prospective cohort | Adults            | 24-hr recall                 |
|                                          | Blanco-Rojo et al. | 2019        | Prospective cohort | Adults            | Diet history                 |
|                                          | Zhong et al.       | 2021        | Prospective cohort | Adults            | FFQ                          |
|                                          | Bonaccio et al.    | 2021        | Prospective cohort | Adults            | FFQ                          |
|                                          | Orlich et al.      | 2022        | Prospective cohort | Adults            | FFQ                          |
| Cancer-related mortality                 |                    |             |                    |                   |                              |
|                                          | Rico-campa et al.  | 2019        | Prospective cohort | Adults            | FFQ                          |
|                                          | Bonaccio et al.    | 2021        | Prospective cohort | Adults            | FFQ                          |
| Cardiovascular disease-related mortality |                    |             |                    |                   |                              |
|                                          | Rico-Campa et al.  | 2019        | Prospective cohort | Adults            | FFQ                          |
|                                          | Kim et al.         | 2019        | Prospective cohort | Adults            | 24-hr recall                 |
|                                          | Zhong et al.       | 2019        | Prospective cohort | Adults            | FFQ                          |
|                                          | Bonaccio et al.    | 2021        | Prospective cohort | Adults            | FFQ                          |
| Heart disease-related mortality          |                    |             |                    |                   |                              |
|                                          | Bonaccio et al.    | 2021        | Prospective cohort | Adults            | FFQ                          |
|                                          | Zhong et al.       | 2021        | Prospective cohort | Adults            | FFQ                          |

| <b>Outcome</b>                 | <b>Author</b>    | <b>Year</b> | <b>Stud design</b> | <b>Population</b> | <b>Exposure measurements</b> |
|--------------------------------|------------------|-------------|--------------------|-------------------|------------------------------|
| <b>Cancer</b>                  |                  |             |                    |                   |                              |
| Breast cancer                  |                  |             |                    |                   |                              |
|                                | Romaguera et al. | 2021        | Case-control       | Adults            | FFQ                          |
|                                | Fiolet et al.    | 2018        | Prospective cohort | Adults            | 24-hr recall                 |
|                                | Jacobs et al.    | 2022        | Case-control       | Adults            | FFQ                          |
|                                | Romieu et al.    | 2022        | Case-control       | Adults            | FFQ                          |
|                                | Queiroz et al.   | 2018        | Case-control       | Adults            | FFQ                          |
|                                | Chang et al.     | 2023        | Prospective cohort | Adults            | 24-hr recall                 |
| Cancer overall                 |                  |             |                    |                   |                              |
|                                | Fiolet et al.    | 2018        | Prospective cohort | Adults            | 24-hr recall                 |
|                                | Fiolet et al.    | 2018        | Prospective cohort | Adults            | 24-hr recall                 |
|                                | Fiolet et al.    | 2018        | Prospective cohort | Adults            | 24-hr recall                 |
|                                | Fiolet et al.    | 2018        | Prospective cohort | Adults            | 24-hr recall                 |
|                                | Wang et al.      | 2022        | Prospective cohort | Adults            | FFQ                          |
|                                | Wang et al.      | 2022        | Prospective cohort | Adults            | FFQ                          |
|                                | Zhong et al.     | 2022        | Prospective cohort | Adults            | Diet history                 |
| Central nervous system tumours |                  |             |                    |                   |                              |
|                                | Esposito et al.  | 2023        | Case-control       | Adults            | FFQ                          |
|                                | Chang et al.     | 2023        | Prospective cohort | Adults            | 24-hr recall                 |
| Chronic lymphocytic leukemia   |                  |             |                    |                   |                              |
|                                | Solans et al.    | 2021        | Case-control       | Adults            | FFQ                          |

| <b>Outcome</b>                 | <b>Author</b>        | <b>Year</b>     | <b>Stud design</b> | <b>Population</b> | <b>Exposure measurements</b> |
|--------------------------------|----------------------|-----------------|--------------------|-------------------|------------------------------|
| Colorectal cancer              | Chang et al.         | 2023            | Prospective cohort | Adults            | 24-hr recall                 |
|                                | Romaguera et al.     | 2021            | Case-control       | Adults            | FFQ                          |
|                                | Fiolet et al.        | 2018            | Prospective cohort | Adults            | 24-hr recall                 |
|                                | Jafari et al.        | 2022            | Case-control       | Adults            | FFQ                          |
|                                | Wang et al.          | 2022 -          | Prospective cohort | Adults - Men      | FFQ                          |
|                                | Wang et al.          | 2022            | Prospective cohort | Adults - Women    | FFQ                          |
|                                | El Kinany et al.     | 2022            | Case-control       | Adults            | FFQ                          |
| Pancreatic cancer              | Chang et al.         | 2023            | Prospective cohort | Adults            | 24-hr recall                 |
|                                | Zhong et al.         | 2022            | Cohort             | Adults            | Diet history                 |
|                                | Chang et al.         | 2023            | Cohort             | Adults            | 24-hr recall                 |
| Prostate cancer                | Romaguera et al.     | 2021            | Case-control       | Adults            | FFQ                          |
|                                | Fiolet et al.        | 2018            | Cohort             | Adults            | FFQ                          |
|                                | Trudeau et al.       | 2020            | Case-control       | Adults            | FFQ                          |
|                                | Chang et al.         | 2023            | Cohort             | Adults            | 24-hr recall                 |
|                                | <b>Mental Health</b> |                 |                    |                   |                              |
| Adverse sleep-related outcomes |                      |                 |                    |                   |                              |
| Sousa et al.                   |                      | 2020            | Cross-sectional    | Adolescents       | FFQ                          |
| Werneck et al.                 | 2020                 | Cross-sectional | Adolescents        | FFQ               |                              |

| <b>Outcome</b>                           | <b>Author</b>       | <b>Year</b> | <b>Stud design</b> | <b>Population</b>        | <b>Exposure measurements</b> |
|------------------------------------------|---------------------|-------------|--------------------|--------------------------|------------------------------|
| Anxiety outcomes                         |                     |             |                    |                          |                              |
|                                          | Werneck et al.      | 2021        | Cross-sectional    | Adolescents - Females    | FFQ                          |
|                                          | Werneck et al.      | 2021        | Cross-sectional    | Adolescents - Males      | FFQ                          |
|                                          | Coletro et al.      | 2022b       | Cross-sectional    | Adults                   | FFQ                          |
|                                          | Noll et al.         | 2022        | Cross-sectional    | Adults                   | 24-hr recall                 |
| Combined common mental disorder outcomes |                     |             |                    |                          |                              |
|                                          | Werneck et al.      | 2021        | Cross-sectional    | Adolescents - Females    | FFQ                          |
|                                          | Werneck et al.      | 2021        | Cross-sectional    | Adolescents - Males      | FFQ                          |
|                                          | Zheng et al.        | 2020        | Cross-sectional    | Adults                   | 24-hr recall                 |
|                                          | Silva et al.        | 2021        | Cross-sectional    | Adolescents              | 24-hr recall                 |
|                                          | Coletro et al.      | 2022b       | Cross-sectional    | Adults                   | FFQ                          |
| Depressive outcomes                      |                     |             |                    |                          |                              |
|                                          | Gomez-Donoso et al. | 2019        | Prospective cohort | Adults                   | FFQ                          |
|                                          | Adjibade et al.     | 2019        | Prospective cohort | Adults                   | 24-hr recall                 |
| <b>Respiratory Health</b>                |                     |             |                    |                          |                              |
| Asthma                                   |                     |             |                    |                          |                              |
|                                          | Melo et al.         | 2018        | Cross-sectional    | Adolescents              | FFQ                          |
|                                          | Azerado et al.      | 2020        | Cross-sectional    | Children and adolescents | FFQ                          |
| Wheezing                                 |                     |             |                    |                          |                              |
|                                          | Melo et al.         | 2018        | Cross-sectional    | Adolescents              | FFQ                          |
|                                          | Azerado et al.      | 2020        | Cross-sectional    | Children and adolescents | FFQ                          |



| <b>Outcome</b>                                                 | <b>Author</b>             | <b>Year</b> | <b>Stud design</b> | <b>Population</b> | <b>Exposure measurements</b> |
|----------------------------------------------------------------|---------------------------|-------------|--------------------|-------------------|------------------------------|
| <b>Cardiovascular Health</b>                                   |                           |             |                    |                   |                              |
| Cardiovascular disease events combined (morbidity + mortality) | Rico-Campa et al.         | 2019        | Prospective cohort | Adults            | FFQ                          |
|                                                                | Kim et al.                | 2019        | Prospective cohort | Adults            | 24-hr recall                 |
|                                                                | Srouf et al.              | 2019        | Prospective cohort | Adults            | 24-hr recall                 |
|                                                                | Zhong et al.              | 2019        | Prospective cohort | Adults            | FFQ                          |
|                                                                | Bonaccio et al.           | 2021        | Prospective cohort | Adults            | FFQ                          |
|                                                                | Du et al.                 | 2021        | Prospective cohort | Adults            | FFQ                          |
| Cardiovascular disease morbidity                               | Srouf et al.              | 2019        | Prospective cohort | Adults            | 24-hr recall                 |
|                                                                | Du et al.                 | 2021        | Prospective cohort | Adults            | FFQ                          |
| Hypertension                                                   | Ivancovsky-Wajcman et al. | 2021        | Cross-sectional    | Adults            | FFQ                          |
|                                                                | Lavinge-Robichaud et al.  | 2018        | Cross-sectional    | Adults            | FFQ                          |
|                                                                | Martinez Steele et al.    | 2019        | Cross-sectional    | Adults            | FFQ                          |
|                                                                | Mendoca et al.            | 2017        | Prospective cohort | Adults            | FFQ                          |
|                                                                | Monge et al.              | 2021        | Prospective cohort | Adults            | FFQ                          |
|                                                                | Nardocci et al.           | 2021        | Cross-sectional    | Adults            | 24-hr recall                 |
|                                                                | Nasreddine et al.         | 2018        | Cross-sectional    | Adults            | FFQ                          |

| <b>Outcome</b>                             | <b>Author</b>            | <b>Year</b> | <b>Stud design</b> | <b>Population</b> | <b>Exposure measurements</b> |
|--------------------------------------------|--------------------------|-------------|--------------------|-------------------|------------------------------|
| Hypertriglyceridaemia                      | Rezende-Alves et al.     | 2021        | Prospective cohort | Adults            | FFQ                          |
|                                            | Scaranni et al.          | 2021        | Prospective cohort | Adults            | FFQ                          |
|                                            | Nasreddine et al.        | 2018        | Cross-sectional    | Adults            | FFQ                          |
|                                            | Lavigne-Robichaud et al. | 2018        | Cross-sectional    | Adults            | 24-hr recall                 |
| Low high-density lipoprotein concentration | Nasreddine et al.        | 2018        | Cross-sectional    | Adults            | FFQ                          |
|                                            | Lavigne-Robichaud et al. | 2018        | Cross-sectional    | Adults            | 24-hr recall                 |
| <b>Gastrointestinal Health</b>             |                          |             |                    |                   |                              |
| Crohn's disease                            | Lo et al.                | 2021        | Prospective cohort | Adults            | FFQ                          |
|                                            | Narula et al.            | 2021        | Prospective cohort | Adults            | FFQ                          |
|                                            | Chen et al.              | 2022        | Prospective cohort | Adults            | 24-hr recall                 |
|                                            | Meyer et al.             | 2022        | Prospective cohort | Adults            | FFQ                          |
| Ulcerative colitis                         | Lo et al.                | 2021        | Prospective cohort | Adults            | FFQ                          |
|                                            | Narula et al.            | 2021        | Prospective cohort | Adults            | FFQ                          |
|                                            | Chen et al.              | 2022        | Prospective cohort | Adults            | 24-hr recall                 |
|                                            | Meyer et al.             | 2022        | Prospective cohort | Adults            | FFQ                          |
| <b>Metabolic Health</b>                    |                          |             |                    |                   |                              |
| Abdominal obesity                          |                          |             |                    |                   |                              |

| <b>Outcome</b>            | <b>Author</b>                     | <b>Year</b>  | <b>Stud design</b> | <b>Population</b>  | <b>Exposure measurements</b> |
|---------------------------|-----------------------------------|--------------|--------------------|--------------------|------------------------------|
| Hyperglycaemia            | Silva et al.                      | 2018         | Cross-sectional    | Adults             | FFQ                          |
|                           | Juul et al.                       | 2018         | Cross-sectional    | Adults             | 24-hr recall                 |
|                           | Rauber et al.                     | 2020         | Cross-sectional    | Adults             | 24-hr recall                 |
|                           | Sandoval-Insausti et al.          | 2020         | Prospective cohort | Adults             | 24-hr recall                 |
|                           | Nasreddine et al.                 | 2018         | Cross-sectional    | Adults             | FFQ                          |
|                           | Lavigne-Robichaud et al.          | 2018         | Cross-sectional    | Adults             | 24-hr recall                 |
| Metabolic syndrome        | Barbosa et al.                    | 2023         | Cross-sectional    | Adults             | 24-hr recall                 |
|                           | Canhada et al.                    | 2023         | Prospective cohort | Adults             | 24-hr recall                 |
|                           | Ivancovsky-Wajcman et al.         | 2021         | Cross-sectional    | Adults             | FFQ                          |
|                           | Magalhaes et al.                  | 2022         | Prospective cohort | Adults             | FFQ                          |
|                           | Martinez-Steele et al.            | 2019         | Cross-sectional    | Adults             | 24-hr recall                 |
|                           | Nasreddine et al.                 | 2018         | Cross-sectional    | Adults             | FFQ                          |
|                           | Pan et al.                        | 2023         | Prospective cohort | Adults             | 24-hr recall                 |
|                           | Tavares et al.                    | 2012         | Cross-sectional    | Adults             | FFQ                          |
|                           | Lavigne-Robichaud et al.          | 2018         | Cross-sectional    | Adults             | 24-hr recall                 |
|                           | Non-alcoholic fatty liver disease | Zhang et al. | 2022               | Prospective cohort | Adults                       |
| Ivancovsky-Wajcman et al. |                                   | 2021         | Cross-sectional    | Adults             | FFQ                          |

| <b>Outcome</b>     | <b>Author</b>         | <b>Year</b> | <b>Stud design</b> | <b>Population</b> | <b>Exposure measurements</b> |
|--------------------|-----------------------|-------------|--------------------|-------------------|------------------------------|
| Obesity            | Friden et al.         | 2022        | Cross-sectional    | Adults            | FFQ                          |
|                    | Konieczna et al.      | 2022        | Prospective cohort | Adults            | FFQ                          |
|                    | Adams et al.          | 2015        | Cross-sectional    | Adults            | 24-hr recall                 |
|                    | Louzada et al.        | 2015        | Cross-sectional    | Adults            | 24-hr recall                 |
|                    | Silva et al.          | 2018        | Cross-sectional    | Adults            | FFQ                          |
|                    | Juul et al.           | 2018        | Cross-sectional    | Adults            | 24-hr recall                 |
|                    | Nardocci et al.       | 2019        | Cross-sectional    | Adults            | 24-hr recall                 |
| Overweight         | Nardocci et al.       | 2020        | Cross-sectional    | Adults            | 24-hr recall                 |
|                    | Rauber et al.         | 2020        | Cross-sectional    | Adults            | 24-hr recall                 |
|                    | Silveira et al.       | 2016        | Cross-sectional    | Adults            | FFQ                          |
|                    | Silva et al.          | 2018        | Cross-sectional    | Adults            | FFQ                          |
| Overweight/obesity | Juul et al.           | 2018        | Cross-sectional    | Adults            | 24-hr recall                 |
|                    | Nardocci et al.       | 2019        | Cross-sectional    | Adults            | 24-hr recall                 |
|                    | Adams et al.          | 2015        | Cross-sectional    | Adults            | 24-hr recall                 |
|                    | Louzada et al.        | 2015        | Cross-sectional    | Adults            | 24-hr recall                 |
| Type two diabetes  | Sour et al.           | 2020        | Prospective cohort | Adults            | 24-hr recall                 |
|                    | Levy et al.           | 2021        | Prospective cohort | Adults            | 24-hr recall                 |
|                    | Llavero-Valero et al. | 2021        | Prospective cohort | Adults            | FFQ                          |

| <b>Outcome</b> | <b>Author</b>                    | <b>Year</b> | <b>Stud design</b> | <b>Population</b> | <b>Exposure measurements</b> |
|----------------|----------------------------------|-------------|--------------------|-------------------|------------------------------|
|                | Duan et al.                      | 2022        | Prospective cohort | Adults            | FFQ                          |
|                | Chen (NHS - women only) et al.   | 2023        | Prospective cohort | Adults            | FFQ                          |
|                | Chen (NHSII - women only) et al. | 2023        | Prospective cohort | Adults            | FFQ                          |

*Note* 24-hr call=twenty-four-hour dietary recall; FFQ=food frequency questionnaire

**Supplementary table G.** Summary of Included Adverse Health Outcomes and Their Reanalysed Associations with Ultra-Processed Food Exposure and Credibility Assessment

| Outcome                                               | Level of exposure comparison | Studies, <i>n</i> | Participants, <i>n</i> | Cases, <i>n</i> | Pooled effect size metric | Pooled effect size | 95%CI        | <i>P</i> value | <i>I</i> <sup>2</sup> | 95%PIs       | Excess significance bias | Small-study effects | Largest study significance | Evidence Class |
|-------------------------------------------------------|------------------------------|-------------------|------------------------|-----------------|---------------------------|--------------------|--------------|----------------|-----------------------|--------------|--------------------------|---------------------|----------------------------|----------------|
| <b>Mortality</b>                                      |                              |                   |                        |                 |                           |                    |              |                |                       |              |                          |                     |                            |                |
| All-cause mortality <sup>1</sup>                      | Non-dose-response            | 7                 | 287969                 | 19827           | RR                        | 1.21               | (1.15, 1.27) | <0.001         | 11.9                  | [1.11, 1.32] | sig.                     | sig.                | sig.                       | II             |
| All-cause mortality <sup>1</sup>                      | Dose-response                | 9                 | 295651                 | 35080           | RR                        | 1.02               | (1.01, 1.03) | <0.001         | 45.6                  | [1.00, 1.05] | sig.                     | sig.                | sig.                       | III            |
| Cancer-related mortality <sup>2</sup>                 | Non-dose-response            | 2                 | 42203                  | 641             | HR                        | 1.00               | (0.81, 1.24) | 0.98           | 0.0                   | na           | na                       | na                  | ns                         | V              |
| Cardiovascular disease-related mortality <sup>1</sup> | Non-dose-response            | 4                 | 152779                 | 4927            | RR                        | 1.50               | (1.37, 1.63) | <0.001         | 0.0                   | [1.24, 1.81] | ns                       | ns                  | sig.                       | I              |
| Cardiovascular disease-related mortality <sup>1</sup> | Dose-response                | 5                 | 147961                 | 7135            | RR                        | 1.05               | (1.02, 1.08) | 0.004          | 85.4                  | na           | ns                       | ns                  | sig.                       | IV             |
| Heart disease-related mortality <sup>2</sup>          | Non-dose-response            | 2                 | 114366                 | 4240            | HR                        | 1.66               | (1.51, 1.84) | <0.001         | 75.5                  | na           | na                       | na                  | sig.                       | II             |
| Heart disease-related mortality <sup>2</sup>          | Dose-response                | 2                 | 114366                 | 4240            | HR                        | 1.18               | (0.95, 1.47) | 0.14           | 0.0                   | na           | na                       | na                  | sig.                       | V              |
| <b>Cancer</b>                                         |                              |                   |                        |                 |                           |                    |              |                |                       |              |                          |                     |                            |                |
| Breast cancer <sup>3</sup>                            | Non-dose-response            | 6                 | 284644                 | 6220            | OR                        | 1.15               | (0.99, 1.34) | 0.06           | 45.8                  | [0.78, 1.69] | ns                       | sig.                | ns                         | V              |

| Outcome                                     | Level of exposure comparison | Studies, <i>n</i> | Participants, <i>n</i> | Cases, <i>n</i> | Pooled effect size metric | Pooled effect size | 95%CI s      | <i>P</i> value | <i>I</i> <sup>2</sup> | 95%PIs       | Excess significance bias | Small-study effects | Largest study significance | Evidence Class |
|---------------------------------------------|------------------------------|-------------------|------------------------|-----------------|---------------------------|--------------------|--------------|----------------|-----------------------|--------------|--------------------------|---------------------|----------------------------|----------------|
| Breast cancer <sup>3</sup>                  | Dose-response                | 3                 | 282684                 | 5240            | OR                        | 1.03               | (0.98, 1.09) | 0.26           | 59.2                  | [0.56, 1.89] | ns                       | ns                  | ns                         | V              |
| Cancer overall <sup>4</sup>                 | Non-dose-response            | 7                 | 825701                 | 7004            | HR                        | 1.12               | (1.06, 1.19) | <0.001         | 33.3                  | [0.98, 1.29] | ns                       | ns                  | ns                         | III            |
| Central nervous system tumours <sup>3</sup> | Non-dose-response            | 2                 | 197558                 | 328             | OR                        | 1.20               | (0.87, 1.65) | 0.27           | 68.2                  | na           | na                       | na                  | sig.                       | V              |
| Chronic lymphocytic leukemia <sup>3</sup>   | Non-dose-response            | 2                 | 199086                 | 448             | OR                        | 1.08               | (0.80, 1.45) | 0.62           | 0.0                   | na           | na                       | na                  | ns                         | V              |
| Colorectal cancer <sup>3</sup>              | Non-dose-response            | 7                 | 723262                 | 8405            | OR                        | 1.23               | (1.10, 1.38) | <0.001         | 67.1                  | [0.88, 1.73] | ns                       | ns                  | ns                         | III            |
| Colorectal cancer <sup>3</sup>              | Dose-response                | 5                 | 720143                 | 6881            | OR                        | 1.04               | (1.01, 1.07) | 0.01           | 55.9                  | [0.95, 1.14] | ns                       | ns                  | ns                         | IV             |
| Pancreatic cancer <sup>3</sup>              | Non-dose-response            | 2                 | 295691                 | 773             | OR                        | 1.24               | (0.85, 1.79) | 0.26           | 59.5                  | na           | na                       | na                  | ns                         | V              |
| Prostate cancer <sup>3</sup>                | Non-dose-response            | 4                 | 226370                 | 6772            | OR                        | 1.02               | (0.93, 1.12) | 0.63           | 0.0                   | [0.84, 1.26] | ns                       | ns                  | ns                         | V              |
| Prostate cancer <sup>3</sup>                | Dose-response                | 3                 | 222460                 | 4853            | OR                        | 0.99               | (0.97, 1.02) | 0.60           | 0.0                   | [0.83, 1.19] | ns                       | ns                  | ns                         | V              |
| <b>Mental Health</b>                        |                              |                   |                        |                 |                           |                    |              |                |                       |              |                          |                     |                            |                |
| Adverse sleep-related outcomes <sup>5</sup> | Non-dose-response            | 2                 | 102191                 | 4804            | OR                        | 1.41               | (1.24, 1.61) | <0.001         | 41.6                  | na           | na                       | na                  | sig.                       | II             |

| Outcome                                                                     | Level of exposure comparison | Studies, <i>n</i> | Participants, <i>n</i> | Cases, <i>n</i> | Pooled effect size metric | Pooled effect size | 95% CIs      | <i>P</i> value | <i>I</i> <sup>2</sup> | 95% PIs      | Excess significance bias | Small-study effects | Largest study significance | Evidence Class |
|-----------------------------------------------------------------------------|------------------------------|-------------------|------------------------|-----------------|---------------------------|--------------------|--------------|----------------|-----------------------|--------------|--------------------------|---------------------|----------------------------|----------------|
| Anxiety outcomes <sup>6</sup>                                               | Non-dose-response            | 4                 | 101709                 | 11711           | OR                        | 1.48               | (1.37, 1.59) | <0.001         | 0.0                   | [1.26, 1.73] | ns                       | ns                  | sig.                       | I              |
| Combined common mental disorder outcomes <sup>6</sup>                       | Non-dose-response            | 6                 | 185773                 | 41948           | OR                        | 1.53               | (1.43, 1.63) | <0.001         | 9.1                   | [1.36, 1.72] | ns                       | ns                  | sig.                       | I              |
| Depressive outcomes <sup>6</sup>                                            | Non-dose-response            | 2                 | 41637                  | 2995            | HR                        | 1.22               | (1.16, 1.28) | <0.001         | 0.0                   | na           | na                       | na                  | sig.                       | II             |
| <b>Respiratory Health</b>                                                   |                              |                   |                        |                 |                           |                    |              |                |                       |              |                          |                     |                            |                |
| Asthma <sup>7</sup>                                                         | Non-dose-response            | 2                 | 111294                 | 14037           | RR                        | 1.20               | (0.99, 1.46) | 0.07           | 36.1                  | na           | na                       | na                  | sig.                       | V              |
| Wheezing <sup>7</sup>                                                       | Non-dose-response            | 2                 | 111294                 | 25590           | RR                        | 1.40               | (1.27, 1.55) | <0.001         | 7.6                   | na           | na                       | na                  | sig.                       | II             |
| <b>Cardiovascular Health</b>                                                |                              |                   |                        |                 |                           |                    |              |                |                       |              |                          |                     |                            |                |
| Cardiovascular disease events combined (morbidity + mortality) <sup>1</sup> | Non-dose-response            | 6                 | 269136                 | 8235            | RR                        | 1.35               | (1.18, 1.54) | <0.001         | 62.1                  | [0.93, 1.96] | ns                       | ns                  | sig.                       | III            |
| Cardiovascular disease events combined (morbidity + mortality) <sup>1</sup> | Dose-response                | 8                 | 289077                 | 11054           | RR                        | 1.04               | (1.02, 1.06) | <0.001         | 75.9                  | [0.99, 1.10] | ns                       | ns                  | sig.                       | III            |



| Outcome                                                 | Level of exposure comparison | Studies, <i>n</i> | Participants, <i>n</i> | Cases, <i>n</i> | Pooled effect size metric | Pooled effect size | 95%CI s      | <i>P</i> value | <i>I</i> <sup>2</sup> | 95%PIs       | Excess significance bias | Small-study effects | Largest study significance | Evidence Class |
|---------------------------------------------------------|------------------------------|-------------------|------------------------|-----------------|---------------------------|--------------------|--------------|----------------|-----------------------|--------------|--------------------------|---------------------|----------------------------|----------------|
| Cardiovascular disease morbidity <sup>1</sup>           | Non-dose-response            | 2                 | 116357                 | 3308            | RR                        | 1.20               | (1.09, 1.33) | <0.001         | 0.0                   | na           | na                       | na                  | sig.                       | III            |
| Cardiovascular disease morbidity <sup>1</sup>           | Dose-response                | 2                 | 117298                 | 3308            | RR                        | 1.04               | (1.02, 1.06) | <0.001         | 0.0                   | na           | na                       | na                  | sig.                       | III            |
| Hypertension <sup>8</sup>                               | Non-dose-response            | 9                 | 111594                 | 13386           | OR                        | 1.23               | (1.11, 1.37) | <0.001         | 52.0                  | [0.92, 1.64] | sig.                     | ns                  | ns                         | III            |
| Hypertriglyceridaemia <sup>9</sup>                      | Non-dose-response            | 2                 | 1113                   | 392             | OR                        | 0.95               | (0.60, 1.50) | 0.82           | 0.0                   | na           | na                       | na                  | ns                         | V              |
| Low high-density lipoprotein concentration <sup>9</sup> | Non-dose-response            | 2                 | 1113                   | 475             | OR                        | 2.02               | (1.27, 3.21) | 0.003          | 0.0                   | na           | na                       | na                  | sig.                       | IV             |
| <b>Gastrointestinal Health</b>                          |                              |                   |                        |                 |                           |                    |              |                |                       |              |                          |                     |                            |                |
| Crohn's disease <sup>10</sup>                           | Non-dose-response            | 4                 | 962593                 | 889             | HR                        | 1.71               | (1.37, 2.14) | <0.001         | 0.0                   | [1.04, 2.80] | ns                       | ns                  | ns                         | IV             |
| Ulcerative colitis <sup>10</sup>                        | Non-dose-response            | 4                 | 962593                 | 1886            | HR                        | 1.17               | (0.86, 1.61) | 0.32           | 73.9                  | [0.30, 4.59] | ns                       | ns                  | ns                         | V              |
| <b>Metabolic Health</b>                                 |                              |                   |                        |                 |                           |                    |              |                |                       |              |                          |                     |                            |                |
| Abdominal obesity <sup>11</sup>                         | Non-dose-response            | 4                 | 31749                  | 13928           | OR                        | 1.41               | (1.18, 1.68) | <0.001         | 62.3                  | [0.70, 2.87] | sig.                     | ns                  | sig.                       | III            |
| Abdominal obesity <sup>11</sup>                         | Dose-response                | 6                 | 66235                  | 17011           | OR                        | 1.05               | (1.02, 1.07) | <0.001         | 76.5                  | [0.98, 1.12] | ns                       | ns                  | sig.                       | III            |

| Outcome                                         | Level of exposure comparison | Studies, <i>n</i> | Participants, <i>n</i> | Cases, <i>n</i> | Pooled effect size metric | Pooled effect size | 95% CIs      | <i>P</i> value | <i>I</i> <sup>2</sup> | 95% PIs      | Excess significance bias | Small-study effects | Largest study significance | Evidence Class |
|-------------------------------------------------|------------------------------|-------------------|------------------------|-----------------|---------------------------|--------------------|--------------|----------------|-----------------------|--------------|--------------------------|---------------------|----------------------------|----------------|
| Hyperglycaemia <sup>9</sup>                     | Non-dose-response            | 2                 | 1113                   | 511             | OR                        | 1.10               | (0.34, 3.52) | 0.87           | 67.4                  | na           | na                       | na                  | sig.                       | V              |
| Metabolic syndrome <sup>12</sup>                | Non-dose-response            | 9                 | 23500                  | 8998            | RR                        | 1.25               | (1.09, 1.42) | 0.001          | 85.0                  | [0.84, 1.85] | sig.                     | sig.                | sig.                       | IV             |
| Non-alcoholic fatty liver disease <sup>13</sup> | Non-dose-response            | 4                 | 23110                  | 9057            | RR                        | 1.23               | (1.03, 1.46) | 0.02           | 89.9                  | [0.59, 2.57] | sig.                     | ns                  | sig.                       | IV             |
| Obesity <sup>11</sup>                           | Non-dose-response            | 7                 | 96485                  | 21241           | OR                        | 1.55               | (1.36, 1.77) | <0.001         | 54.8                  | [1.06, 2.26] | sig.                     | ns                  | sig.                       | II             |
| Obesity <sup>11</sup>                           | Dose-response                | 7                 | 80064                  | 15769           | OR                        | 1.07               | (1.03, 1.11) | 0.001          | 88.4                  | [0.95, 1.21] | sig.                     | sig.                | ns                         | III            |
| Overweight <sup>11</sup>                        | Non-dose-response            | 4                 | 44820                  | 21927           | OR                        | 1.36               | (1.14, 1.63) | 0.001          | 72.6                  | [0.65, 2.87] | ns                       | ns                  | ns                         | III            |
| Overweight <sup>11</sup>                        | Dose-response                | 2                 | 24954                  | 14530           | OR                        | 1.06               | (1.03, 1.10) | 0.001          | 54.2                  | na           | na                       | na                  | sig.                       | III            |
| Overweight + obesity <sup>11</sup>              | Non-dose-response            | 2                 | 32417                  | 13791           | OR                        | 1.29               | (1.05, 1.58) | 0.02           | 0.0                   | na           | na                       | na                  | ns                         | IV             |
| Overweight + obesity <sup>11</sup>              | Dose-response                | 3                 | 15152                  | 4302            | OR                        | 1.03               | (1.01, 1.06) | 0.005          | 38.9                  | [0.84, 1.28] | ns                       | ns                  | sig.                       | IV             |
| Type two diabetes <sup>14</sup>                 | Non-dose-response            | 7                 | 415554                 | 21932           | OR                        | 1.40               | (1.23, 1.59) | <0.001         | 88.1                  | [0.91, 2.13] | sig.                     | ns                  | sig.                       | II             |
| Type two diabetes <sup>14</sup>                 | Dose-response                | 7                 | 415554                 | 21932           | RR                        | 1.12               | (1.11, 1.13) | <0.001         | 2.2                   | [1.10, 1.14] | ns                       | ns                  | sig.                       | I              |

Note 95% CIs, ninety-five percent confidence intervals; 95% PIs, ninety-five percent prediction intervals; HR, hazard ratio; *I*<sup>2</sup>, I-squared statistic; na, not applicable; ns, non-significant; *n*, number; OR, odds ratio; *P* value, probability value; RR, risk ratio; sig., significant. Evidence class criteria—class I: statistical significance at *P* < 10<sup>-6</sup>, >1000 cases (or >20,000 participants for continuous outcomes); the 95% prediction interval

excluded the null, no large heterogeneity ( $I^2 < 50\%$ ), no evidence of small-study effects and excess significance bias; class II: significance at  $P < 10^{-6}$ ,  $>1000$  cases (or  $>20,000$  participants for continuous outcomes), the largest component study reported a significant effect ( $P \leq 0.05$ ); class III: statistical significance at  $P < 10^{-3}$ ,  $>1000$  cases (or  $>20,000$  participants for continuous outcomes); class IV: the remaining significant associations at  $P \leq 0.05$ ; and, class V:  $P > 0.05$ .

## References

- 1 Yuan, L. *et al.* Dose-response meta-analysis of ultra-processed food with the risk of cardiovascular events and all-cause mortality: evidence from prospective cohort studies. *Food Funct* **14**, 2586-2596, doi:10.1039/d2fo02628g (2023).
- 2 Suksatan, W. *et al.* Ultra-Processed Food Consumption and Adult Mortality Risk: A Systematic Review and Dose-Response Meta-Analysis of 207,291 Participants. *Nutrients* **14**, doi:10.3390/nu14010174 (2021).
- 3 Lian, Y., Wang, G.-P., Chen, G.-Q., Chen, H.-N. & Zhang, G.-Y. Association between ultra-processed foods and risk of cancer: a systematic review and meta-analysis. *Frontiers in Nutrition* **10**, doi:10.3389/fnut.2023.1175994 (2023).
- 4 Isaksen, I. M. & Dankel, S. N. Ultra-processed food consumption and cancer risk: A systematic review and meta-analysis. *Clin Nutr* **42**, 919-928, doi:10.1016/j.clnu.2023.03.018 (2023).
- 5 Delpino, F. M. *et al.* Intake of ultra-processed foods and sleep-related outcomes: A systematic review and meta-analysis. *Nutrition* **106**, 111908, doi:10.1016/j.nut.2022.111908 (2023).
- 6 Lane, M. M. *et al.* Ultra-Processed Food Consumption and Mental Health: A Systematic Review and Meta-Analysis of Observational Studies. *Nutrients* **14**, doi:10.3390/nu14132568 (2022).
- 7 Lane, M. M. *et al.* Ultraprocessed food and chronic noncommunicable diseases: A systematic review and meta-analysis of 43 observational studies. *Obes Rev* **22**, e13146, doi:10.1111/obr.13146 (2021).
- 8 Wang, M., Du, X., Huang, W. & Xu, Y. Ultra-processed Foods Consumption Increases the Risk of Hypertension in Adults: A Systematic Review and Meta-analysis. *Am J Hypertens* **35**, 892-901, doi:10.1093/ajh/hpac069 (2022).
- 9 Pagliai, G. *et al.* Consumption of ultra-processed foods and health status: a systematic review and meta-analysis. *Br J Nutr* **125**, 308-318, doi:10.1017/s0007114520002688 (2021).
- 10 Narula, N. *et al.* Food Processing and Risk of Inflammatory Bowel Disease: A Systematic Review and Meta-Analysis. *Clin Gastroenterol Hepatol*, doi:10.1016/j.cgh.2023.01.012 (2023).
- 11 Moradi, S. *et al.* Ultra-processed food consumption and adult obesity risk: a systematic review and dose-response meta-analysis. *Crit Rev Food Sci Nutr* **63**, 249-260, doi:10.1080/10408398.2021.1946005 (2023).
- 12 Shu, L., Zhang, X., Zhou, J., Zhu, Q. & Si, C. Ultra-processed food consumption and increased risk of metabolic syndrome: a systematic review and meta-analysis of observational studies. *Frontiers in Nutrition* **10**, doi:10.3389/fnut.2023.1211797 (2023).
- 13 Henney, A. E., Gillespie, C. S., Alam, U., Hydes, T. J. & Cuthbertson, D. J. Ultra-Processed Food Intake Is Associated with Non-Alcoholic Fatty Liver Disease in Adults: A Systematic Review and Meta-Analysis. *Nutrients* **15**, doi:10.3390/nu15102266 (2023).
- 14 Chen, Z. *et al.* Ultra-Processed Food Consumption and Risk of Type 2 Diabetes: Three Large Prospective U.S. Cohort Studies. *Diabetes Care*, doi:10.2337/dc22-1993 (2023).
